# Supplementary material
Source: publisher site journal article supplement (https://dez.pensoft.net/article/55732/download/suppl/36/)
Supplement: Supplementary file 1

**Appendix 6** List of individuals for which no exact species affiliation could be determined. With ID-number, genus, species previously determined by the collector and their sex. In addition, diagnostic characteristics are indicated: puncturation on tergites, mesonotum, and mesopleura, and structure on galea and clypeus. The different expressions of the characteristics were noted for each individual: (bre) *C. brevigena*, (col) *C. collaris*, (hed) *C. hederiae*, (suc) *C. succinctus*, (others) fully punctured mesonotum, (+) galea with microstructure between sensilla, (-) galea without microstructure between sensilla, (?) non-classifiable, because proboscis retracted,

(---) clypeus structure not apparent in males.

| ID  | Genus           | Previously determined as... | Sex    | Tergites | Mesonotum | Mesopleura | Galea | Clypeus |
|-----|-----------------|-----------------------------|--------|----------|-----------|------------|-------|---------|
| 61  | <i>Colletes</i> | <i>brevigena</i>            | female | hed      | others    | hed        | +     | suc     |
| 62  | <i>Colletes</i> | <i>brevigena</i>            | female | bre      | suc       | bre        | +     | bre     |
| 63  | <i>Colletes</i> | <i>brevigena</i>            | female | bre      | suc       | bre        | +     | bre     |
| 64  | <i>Colletes</i> | <i>brevigena</i>            | female | bre      | suc       | bre        | +     | bre     |
| 65  | <i>Colletes</i> | <i>brevigena</i>            | female | suc      | others    | hed        | +     | bre     |
| 66  | <i>Colletes</i> | <i>brevigena</i>            | female | hed      | suc       | hed        | +     | hed     |
| 116 | <i>Colletes</i> | <i>succinctus</i>           | male   | suc      | others    | suc        | ?     | ---     |
| 124 | <i>Colletes</i> | <i>succinctus</i>           | male   | ?        | suc       | ?          | ?     | ---     |
| 125 | <i>Colletes</i> | <i>succinctus</i>           | female | suc      | suc       | suc        | +     | suc     |
| 126 | <i>Colletes</i> | <i>succinctus</i>           | male   | hed      | suc       | hed        | ?     | ---     |
| 130 | <i>Colletes</i> | <i>succinctus</i>           | female | suc      | suc       | bre        | ?     | suc     |
| 131 | <i>Colletes</i> | <i>succinctus</i>           | female | suc      | suc       | suc        | +     | hed     |
| 132 | <i>Colletes</i> | <i>succinctus</i>           | male   | suc      | suc       | suc        | +     | ---     |
| 133 | <i>Colletes</i> | <i>succinctus</i>           | male   | suc      | suc       | suc        | +     | ---     |
| 134 | <i>Colletes</i> | <i>succinctus</i>           | male   | suc      | others    | bre        | +     | ---     |
| 135 | <i>Colletes</i> | <i>succinctus</i>           | male   | suc      | suc       | suc        | +     | ---     |
| 137 | <i>Colletes</i> | <i>succinctus</i>           | female | hed      | suc       | hed        | ?     | suc     |
| 138 | <i>Colletes</i> | <i>succinctus</i>           | female | bre      | suc       | suc        | ?     | suc     |
| 143 | <i>Colletes</i> | <i>succinctus</i>           | male   | bre      | suc       | bre        | +     | ---     |
| 144 | <i>Colletes</i> | <i>succinctus</i>           | male   | suc      | suc       | bre        | ?     | ---     |
| 145 | <i>Colletes</i> | <i>succinctus</i>           | male   | suc      | suc       | bre        | ?     | ---     |
| 147 | <i>Colletes</i> | <i>succinctus</i>           | female | suc      | suc       | suc        | ?     | bre     |
| 148 | <i>Colletes</i> | <i>succinctus</i>           | female | suc      | others    | suc        | ?     | suc     |
| 149 | <i>Colletes</i> | <i>succinctus</i>           | female | hed      | suc       | hed        | ?     | hed     |
| 152 | <i>Colletes</i> | <i>succinctus</i>           | female | bre      | suc       | bre        | ?     | bre     |
| 153 | <i>Colletes</i> | <i>succinctus</i>           | male   | suc      | suc       | bre        | ?     | ---     |
| 154 | <i>Colletes</i> | <i>succinctus</i>           | male   | hed      | others    | hed        | ?     | ---     |
| 156 | <i>Colletes</i> | <i>succinctus</i>           | male   | suc      | suc       | bre        | ?     | ---     |
